# Supplementary material
Source: PubMed Central journal article supplement (PMC3093972)

Supplementary Fig. 1

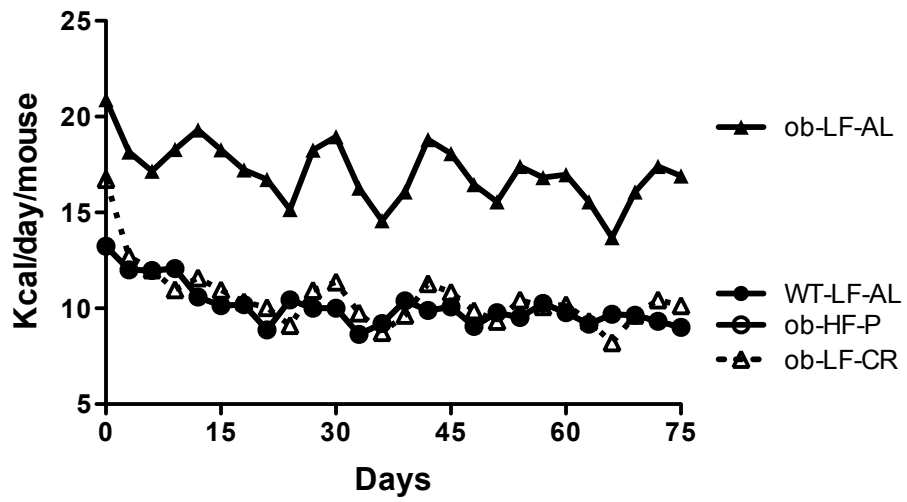

Supplementary Fig. 2

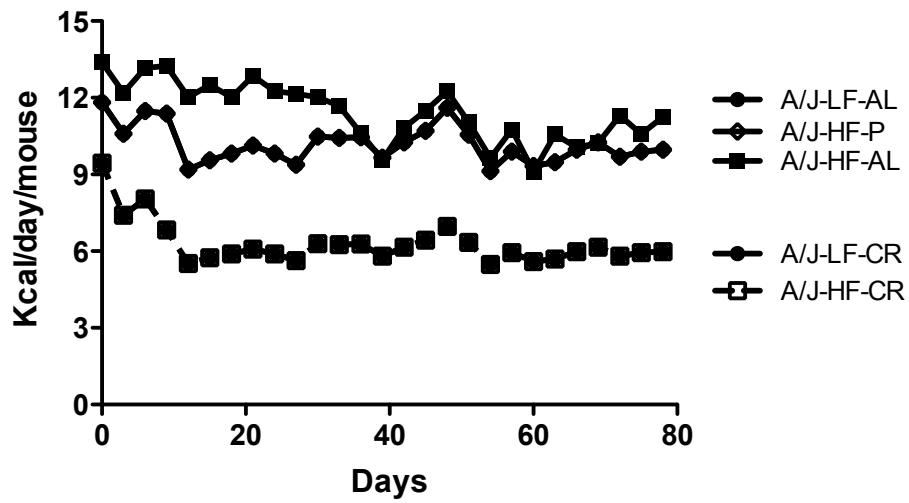

Supplementary Fig. 3a

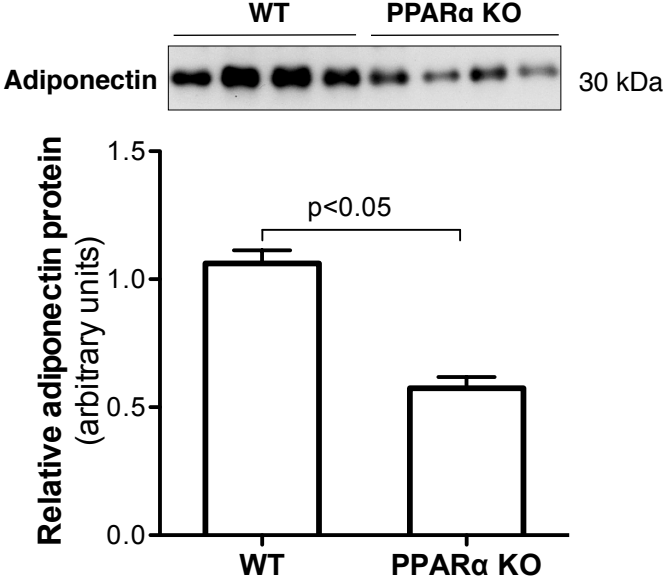

Supplementary Fig. 3b

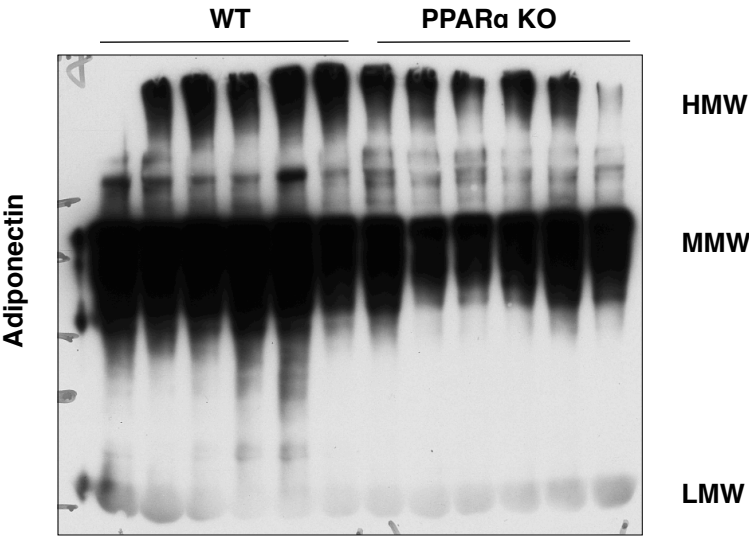

Supplement: supp_00004.2011_suppfigs.pdf [file supp_00004.2011_suppfigs.pdf]
